# Supplementary material for: Reservoir of Antibiotic Residues and Resistant Coagulase Negative Staphylococci in a Healthy Population in the Greater Accra Region, Ghana
Source: MDPI journal article supplement (doi:10.3390/antibiotics11010119), 2022-01-17
Supplement: s1 [file s1]

## **Supplementary Materials**

### **Reservoir of Antibiotic Residues and Resistant Coagulase Negative Staphylococci in a Healthy Population in the Greater Accra Region, Ghana**

Samuel Oppong Bekoe \*, Sophie Hane-Weijman, Sofie Louise Trads, Emmanuel Orman, Japheth Opintan, Martin Hansen, Niels Frimodt-Møller and Bjarne Styrishave

**Table S1.** Validation parameters summarised for the investigated antibiotics.

|                                            | AMX                                              | AMP                    | CFX                    | CPF                    | ETM                    | MTZ                    | STX                    | TCC                    | TMP                    |
|--------------------------------------------|--------------------------------------------------|------------------------|------------------------|------------------------|------------------------|------------------------|------------------------|------------------------|------------------------|
| <b>LDR (ng mL<sup>-1</sup>)</b>            | 500 to 5000 ng mL <sup>-1</sup> for all analytes |                        |                        |                        |                        |                        |                        |                        |                        |
| <b>r<sup>2</sup></b>                       | 0.941                                            | 0.991                  | 0.983                  | 0.989                  | 0.987                  | 0.977                  | 0.993                  | 0.948                  | 0.984                  |
| <b>Instrument LOD (ng mL<sup>-1</sup>)</b> | 1.18 × 10 <sup>3</sup>                           | 5.57 × 10 <sup>2</sup> | 1.18 × 10 <sup>3</sup> | 5.50 × 10 <sup>2</sup> | 4.61 × 10 <sup>2</sup> | 1.11 × 10 <sup>3</sup> | 3.72 × 10 <sup>2</sup> | 9.25 × 10 <sup>2</sup> | 3.10 × 10 <sup>2</sup> |
| <b>Instrument LOQ (ng mL<sup>-1</sup>)</b> | 3.57 × 10 <sup>3</sup>                           | 1.69 × 10 <sup>3</sup> | 3.57 × 10 <sup>3</sup> | 1.67 × 10 <sup>3</sup> | 1.40 × 10 <sup>3</sup> | 3.37 × 10 <sup>3</sup> | 1.13 × 10 <sup>3</sup> | 2.80 × 10 <sup>3</sup> | 9.40 × 10 <sup>2</sup> |
| <b>Instrument precision (CV)</b>           | 17.0                                             | 6.1                    | 11.2                   | 5.7                    | 4.1                    | 8.7                    | 4.0                    | 8.0                    | 3.2                    |
| <b>Accuracy ± CV</b>                       | 111 ± 7                                          | 107 ± 5                | 99 ± 3                 | 101 ± 8                | 108 ± 12               | 112 ± 7                | 101 ± 9                | 104 ± 3                | 92 ± 11                |

*Linear dynamic range (LDR), coefficient of correlation (r<sup>2</sup>), instrument LOD and LOQ were determined from linear regression curves. Concentration units of parameters investigated are in ng mL<sup>-1</sup>. AMX – Amoxicillin, CFX – Cefuroxime, ETM – Erythromycin, MTZ – Metronidazole, STX – Sulphamethoxazole, TCC – Tetracycline and TMP – Trimethoprim*

**Table S2.** Overview of samples collected and subsequent isolation of coagulase-negative strains of staphylococcus

| Collection site | Total samples collected (% of total samples) | Number of urine samples with CoNS (% of total urine samples) | Number of isolates (% of total CoNS) * |
|-----------------|----------------------------------------------|--------------------------------------------------------------|----------------------------------------|
| Dodowa          | 201 (50.1)                                   | 30 (14.9)                                                    | 37 (58.7)                              |
| Korle-Gonno     | 200 (49.9)                                   | 17 (8.5)                                                     | 26 (41.3)                              |
| Total           | 401                                          | 47(11.7)                                                     | 63                                     |

*\*Some samples contained multiple strains of CoNS.*

**Table S3.** Overview of Results from the Detection of Antibiotic Residues

| Presence of Antibiotics | Samples containing CoNS | Samples without CoNS (% of total without CoNS) | Total Number of Samples (% of total for both types of samples) |
|-------------------------|-------------------------|------------------------------------------------|----------------------------------------------------------------|
| Yes                     | 42 (89.4)               | 47 (13.3)                                      | 89 (22.2)                                                      |
| No                      | 5 (10.6)                | 307 (86.7)                                     | 312 (77.8)                                                     |
| Total                   | 47                      | 354                                            | 401                                                            |

**Table S4.** Classification of samples with detected antibiotics based on location

| Location    | Samples containing CoNS (% of total with CoNS) | Samples without CoNS (% of total without CoNS) | Total Number of Samples (% of total for both types of samples) |
|-------------|------------------------------------------------|------------------------------------------------|----------------------------------------------------------------|
| Dodowa      | 28 (52.8)                                      | 25 (47.1)                                      | 53 (59.6)                                                      |
| Korle-Gonno | 14 (38.9)                                      | 22 (61.1)                                      | 36 (40.4)                                                      |
| Total       | 42                                             | 47                                             | 89                                                             |

**Table S5.** Frequency of antibiotic residues detected in the urine samples

| Antibiotic        | Dodowa                  |                      |                                                | Korle-Gonno             |                      |                                                | Total number of antibiotics in the 89 samples (A + B) |
|-------------------|-------------------------|----------------------|------------------------------------------------|-------------------------|----------------------|------------------------------------------------|-------------------------------------------------------|
|                   | Samples containing CoNS | Samples without CoNS | Sub-total of samples containing antibiotic (A) | Samples containing CoNS | Samples without CoNS | Sub-total of samples containing antibiotic (B) |                                                       |
| Amoxicillin       | 1                       | 0                    | 1                                              | 2                       | 4                    | 6                                              | 7                                                     |
| Ampicillin        | 2                       | 4                    | 6                                              | 1                       | 1                    | 2                                              | 8                                                     |
| Ciprofloxacin     | 20                      | 3                    | 23                                             | 12                      | 13                   | 25                                             | 48                                                    |
| Metronidazole     | 2                       | 0                    | 2                                              | 1                       | 1                    | 2                                              | 4                                                     |
| Sulphamethoxazole | 4                       | 1                    | 5                                              | 0                       | 2                    | 2                                              | 7                                                     |
| Tetracycline      | 17                      | 23                   | 40                                             | 6                       | 10                   | 16                                             | 56                                                    |
| Trimethoprim      | 4                       | 1                    | 5                                              | 3                       | 2                    | 5                                              | 10                                                    |
| Total             | 50                      | 32                   | 82                                             | 25                      | 33                   | 58                                             | 140                                                   |

## **File S1: Details on the conduct of survey**

### **A. INFORMATION TO THE PARTICIPANT ABOUT THE PROJECT**

The Antibiotic Drug Use, Monitoring and Evaluation of Resistance Project is a research-building collaboration between Ghana and Denmark. It is funded by DANIDA (Danish International Development Assistance). The project strives to increase knowledge on antibiotic consumption, use and resistance, and further to spread this knowledge in order to gain awareness on the importance of prudent antibiotic use principles. The aim of the specific study that you are being asked to participate in is to investigate if there are small traces of pharmaceuticals in the bodies of healthy, fit members of the community, such as yourself. We strive to gather about 200 samples from your community, with a wide range of ages and both male and female. You have been selected randomly, without bias, based on your healthy, fit appearance. Participation is 100% voluntary, and you are in no way obligated to participate. If you choose to participate, the researcher will:

1. Explain the project to you (by sharing this information with you).
2. Provide you with a bottle of drinking water for you to consume during the questionnaire, to make the collection of urine easier.
3. Administer the questionnaire, containing simple questions about your health, education, diet and water consumption.
4. Hand you a sterile container for gathering your urine sample. The sample will be labeled with a random code to protect your privacy.
5. Store the sample in an ice chest and transport it to the nearest lab where the initial tests will be conducted the same day.
6. Thank you for your participation and be on his or her way.

Because you are considered a fit and healthy individual, it is very unlikely that any bacteria will be found in your urine. However, in the unlikely case that bacterial growth is found, we will inform you within a week and refer you to a doctor for paid further tests and, if necessary, medical treatment.

Thank you for your participation!

## **B. CERTIFICATE OF CONSENT**

I have been invited to participate in a research project about health seeking behaviour and medicine use. I understand that every one of the 200 participants in the Dodowa and Korle-Gonno area in this study was selected randomly and without bias and that my urine sample will be collected, around 80 ml -150 ml, and used for a large, international study to improve knowledge on pharmaceutical use, its sources and resistance as well as provide scientific data to inform policy. I understand that my urine sample will be screened for bacteria and pharmaceuticals and that I will be provided feedback after the initial bacterial screening within 4 to 5 working days by phone, to be informed of the presence of bacteria in my urine and, if necessary, provided a voucher to seek medical attention in the unlikely event that a bacterial infection is found. I understand that my urine will not be used for any other purpose and disposed after 9 months upon completion of the study. I understand that all information from the questionnaire as well as urine sample results will be kept completely confidential and the only use of my name will be to provide feedback to me, and that a random code will be assigned to my sample to ensure my privacy. I have read the foregoing information, or it has been read to me. I have had the opportunity to ask questions about it and any questions.

**Any questions or concerns I may have can be answered by contacting either Dr. Opintan, at +233302665404 or Prof. Newman at +233244329266, who are both from the University of Ghana Medical School, at the Department of Microbiology. Any questions I have, have been answered to my satisfaction. I consent voluntarily to be a participant in this study.**

Print Name of Participant: \_\_\_\_\_

Signature / Thumbprint of Participant: \_\_\_\_\_ or

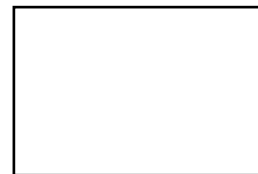

Date: \_\_\_\_\_

Day / month / year

*If Participant is a minor,*

Signature / Thumbprint of Guardian: \_\_\_\_\_ or

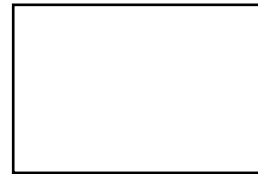

**For Participants who are illiterates<sup>1</sup>**

I have witnessed the accurate reading of the consent form to the potential participant, and the individual has had opportunity to ask questions. I confirm that the individual has given consent freely.

Name of Witness: \_\_\_\_\_



Signature / Thumbprint of Witness: \_\_\_\_\_ or

Date: \_\_\_\_\_

Day / month / year

<sup>1</sup> A literate witness must sign (if possible, this person should be selected by the participant and should have no connection to the research team). Participants who are illiterate should include their thumb print as well.

## C. INFORMED CONSENT PROCEDURE

### INTRODUCTION

Interview Serial/Sample Number: \_\_\_\_\_

*(should be the same as label on sample)*

Before beginning interview, please ensure that participant appears to be healthy. Ask if they have taken any medication and attempt to identify using catalogue. If you suspect they have taken antibiotics, please explain to them that they cannot be included in study and move on to next possible participant.

If participant is excluded, please note their name and the reason why they were excluded, to enable a total count of participants excluded and sampled.

### Section 1 – Demographics

---

|                                                 |                                                                                                                                                                                                                                                                           |                                                                                 |
|-------------------------------------------------|---------------------------------------------------------------------------------------------------------------------------------------------------------------------------------------------------------------------------------------------------------------------------|---------------------------------------------------------------------------------|
| Study site                                      | Korle-Gonno <input type="checkbox"/>                                                                                                                                                                                                                                      | Dodowa <input type="checkbox"/>                                                 |
| Name of community where interviewee resides     | _____                                                                                                                                                                                                                                                                     |                                                                                 |
| Age of interviewee                              | _____ years                                                                                                                                                                                                                                                               |                                                                                 |
| Gender                                          | Male <input type="checkbox"/>                                                                                                                                                                                                                                             | Female <input type="checkbox"/>                                                 |
| Marital Status                                  | Married or living together <input type="checkbox"/> Divorced/separated <input type="checkbox"/><br>Widowed <input type="checkbox"/> Never married/never lived together <input type="checkbox"/>                                                                           |                                                                                 |
| Highest education level attained by interviewee | No education/Illiterate <input type="checkbox"/> Primary level <input type="checkbox"/> Middle/JSS/JHS <input type="checkbox"/><br>Secondary/SSS/SHS/Vocational/Technical <input type="checkbox"/> Higher <input type="checkbox"/><br>Don't Know <input type="checkbox"/> |                                                                                 |
| Occupation                                      | _____                                                                                                                                                                                                                                                                     |                                                                                 |
| Health Insurance status of interviewee          | NHIS <input type="checkbox"/><br>None <input type="checkbox"/>                                                                                                                                                                                                            | Other insurance <input type="checkbox"/><br>Don't know <input type="checkbox"/> |
| Validity of Health Insurance                    | Valid <input type="checkbox"/><br>Not Applicable <input type="checkbox"/>                                                                                                                                                                                                 | Not valid <input type="checkbox"/><br>Don't know <input type="checkbox"/>       |
| Date of Interview                               | _____/_____/_____                                                                                                                                                                                                                                                         |                                                                                 |
| Name of interviewer                             | _____                                                                                                                                                                                                                                                                     |                                                                                 |

---



---

Language of interview    English ☐    Akan ☐    Ga ☐    Ewe ☐  
                                         Nzema ☐    Dagbani ☐    Hausa ☐    Other ☐    specify  
                                         \_\_\_\_\_

Language of respondent    English ☐    Akan ☐    Ga ☐    Ewe ☐  
                                         Nzema ☐    Dagbani ☐    Hausa ☐    Other ☐    specify  
                                         \_\_\_\_\_

Translator used    Yes ☐    No ☐

---

## Section 2 - Medicine

1. How is your health today?    Well ☐    Unwell ☐

\_\_\_\_\_  
*(If participant suggest he/she is unwell, continue to question 2, otherwise move to question 3)*

2. So how are you managing your ill-health?

\_\_\_\_\_

3. Are there any medicines that you use either regularly or once a while (other than antibiotics)?

\_\_\_\_\_

\_\_\_\_\_

*(probe for both orthodox and traditional medicines)*

4. Have you taken any medication within the past 14 days?    Yes ☐    No ☐

5. If, yes – what medication? (Show catalogue if necessary)

\_\_\_\_\_

\_\_\_\_\_

6. How do you take the medicines (probe for drug administration information)?

\_\_\_\_\_

\_\_\_\_\_

7. For what conditions are you using the medicines to manage (probe for each medicine stated)?

- 
- 
8. How did you know that this medicine(s) is indicated for your condition? (if medicines are self-prescribed)
- 
- 

**Note: questions 5 – 8 applies to all medicines stated in questions 3 and 4**

### Section 3 - Diet

1. Do you consume animal or fish products in your diet? Yes ☐ No ☐  
(If not skip to question 4).
2. What type of animal or fish products do you consume? (tick as many as apply)
- Chicken ☐ Beef ☐ Goat/Sheep meat ☐  
Pig meat ☐ Bush meat ☐ Snails ☐  
Eggs ☐ Fish ☐ Other ☐ (Specify) \_\_\_\_\_
3. Which animal or fish products did you consume today and yesterday? (Tick as many as apply)
- Chicken ☐ Beef ☐ Goat/Sheep meat ☐  
Pig meat ☐ Bush meat ☐ Snails ☐  
Eggs ☐ Fish ☐ Other ☐ (Specify) \_\_\_\_\_
4. What is your main drinking water source?
- Bottled water ☐ Pure water (Sachet water) ☐ Tap water ☐  
Pond/River water ☐ Other ☐ (Specify) \_\_\_\_\_
5. Home Filtered Yes ☐ No ☐  
Boiled water Yes ☐ No ☐
6. Which drinking water sources have you used today and yesterday? (Tick as many as apply)
- Bottled water ☐ Pure water (Sachet water) ☐ Tap water ☐

Pond/River water ☐ Other ☐ (Specify) \_\_\_\_\_

7. Is there anything else you wish to share with me or questions you may have?

---



---

8. Can I please have your telephone contact in case I need to call you to seek more information or clarification?

Tel. No \_\_\_\_\_

**Notes from field.**

| <b>Remedy Used</b> | <b>Date used*</b> | <b>Dosage (dose / Frequency /duration)</b> | <b>Reason for use</b> | <b>Prescriber (e.g. Dr; nurse, pharmacist; self; relative; peddler; drug store attendant etc)</b> | <b>Source of Remedy (Peddler/ hospital/ drug store)</b> | <b>Treatment Outcome</b> |
|--------------------|-------------------|--------------------------------------------|-----------------------|---------------------------------------------------------------------------------------------------|---------------------------------------------------------|--------------------------|
|                    |                   |                                            |                       |                                                                                                   |                                                         |                          |
|                    |                   |                                            |                       |                                                                                                   |                                                         |                          |
|                    |                   |                                            |                       |                                                                                                   |                                                         |                          |
|                    |                   |                                            |                       |                                                                                                   |                                                         |                          |
|                    |                   |                                            |                       |                                                                                                   |                                                         |                          |
|                    |                   |                                            |                       |                                                                                                   |                                                         |                          |
|                    |                   |                                            |                       |                                                                                                   |                                                         |                          |
|                    |                   |                                            |                       |                                                                                                   |                                                         |                          |
|                    |                   |                                            |                       |                                                                                                   |                                                         |                          |
|                    |                   |                                            |                       |                                                                                                   |                                                         |                          |
|                    |                   |                                            |                       |                                                                                                   |                                                         |                          |
|                    |                   |                                            |                       |                                                                                                   |                                                         |                          |
|                    |                   |                                            |                       |                                                                                                   |                                                         |                          |
|                    |                   |                                            |                       |                                                                                                   |                                                         |                          |
|                    |                   |                                            |                       |                                                                                                   |                                                         |                          |

\*Date Used: Is exact/rough date available, please state otherwise indicate regularity of use e.g., 10 capsules weekly or monthly or when necessary/when symptoms appear etc.

**Table S6.** Residual Concentrations of the Antibiotics in the Urine Samples

| Analyte           | No. of samples containing quantifiable levels (N = 75) | Median (ng mL <sup>-1</sup> ) | Range (Min - Max) (ng mL <sup>-1</sup> ) |
|-------------------|--------------------------------------------------------|-------------------------------|------------------------------------------|
| Amoxicillin       | 7                                                      | 10.3                          | 1.89 – 17000                             |
| Ampicillin        | 5                                                      | 5.4                           | 3.52 – 1180                              |
| Ciprofloxacin     | 48                                                     | 14.55                         | 1.7 – 1460                               |
| Metronidazole     | 3                                                      | 167                           | 11.9 – 4000                              |
| Sulphamethoxazole | 7                                                      | 16.4                          | 5.19 – 154                               |
| Tetracycline      | 41                                                     | 26.7                          | 4.19 – 986                               |
| Trimethoprim      | 9                                                      | 2.91                          | 1.44 – 5.41                              |

**Table S7.** EUCAST Susceptibility/Resistance breakpoint data (EUCAST, 2020)

| Antibiotic                                      | Zone diameter breakpoint (mm) |     | Antibiotic         | Zone diameter breakpoint (mm) |     |
|-------------------------------------------------|-------------------------------|-----|--------------------|-------------------------------|-----|
|                                                 | S ≥                           | R < |                    | S ≥                           | R < |
| Penicillin V                                    | 26                            | 26  | Chloramphenicol    | 18                            | 18  |
| Cefoxitin                                       | 25                            | 25  | Fusidic acid       | 24                            | 24  |
| Gentamicin                                      | 22                            | 22  | Sulphamethoxazole* | 16                            | 11  |
| Erythromycin                                    | 21                            | 18  | Trimethoprim       | 17                            | 14  |
| Clindamycin                                     | 22                            | 19  | Rifampicin         | 26                            | 23  |
| Tetracycline                                    | 22                            | 19  | Novobiocin         | 16                            | 16  |
| MIC breakpoint (mg L <sup>-1</sup> ) for E-test |                               |     |                    |                               |     |
| Vancomycin                                      | 4                             | 4   |                    |                               |     |

\*Value from Department of Clinical Microbiology, Hvidovre Hospital (DK).

**Table S8.** Mass spectrometry specific parameters in the validated LC-MS/MS analytical method indicating ion transitions for the test antibiotics and 3 deuterated internal standards.

|                      | Retention<br>time<br>(mins) | Mode of<br>Ionization | Precursor<br>ion | Quantifier ><br>Qualifier | Dwell<br>Time<br>(MS) | DP<br>(V) | FP (V) | EP (V) | CE<br>(eV) | CXP<br>(V) |
|----------------------|-----------------------------|-----------------------|------------------|---------------------------|-----------------------|-----------|--------|--------|------------|------------|
| Amoxicillin          | 1.98                        | Negative              | 364.3            | 222.8 > 302.8             | 200                   | -50       | -200   | -10    | -20        | -10        |
| Metronidazole        | 14.46                       | Positive              | 172              | 128.0 > 82                | 200                   | 25        | 80     | 7      | 20/37      | 19/7       |
| Trimethoprim         | 16.07                       | Positive              | 291              | 230 > 261                 | 100                   | 40        | 140    | 6      | 34/36      | 15/19      |
| d3-Trimethoprim      | -                           | Positive              | 294              | 230 > 264                 | 200                   | 40        | 140    | 6      | 34/36      | 15/19      |
| Ciprofloxacin        | 17.36                       | Positive              | 332              | 314 > 288.3               | 200                   | 55        | 175    | 10     | 30         | 20         |
| d8-Ciprofloxacin     | -                           | Positive              | 340              | 322.3 > 296               | 200                   | 55        | 175    | 10     | 30         | 20         |
| Tetracycline         | 19.38                       | Negative              | 443.2            | 357.9 > 186.9             | 200                   | -20       | -200   | -10    | -30        | -10        |
| Ampicillin           | 22.93                       | Negative              | 348              | 270 > 215                 | 100                   | -20       | -95    | -8     | -20/-35    | -4/-12     |
| Cefuroxime           | 24.19                       | Negative              | 423.2            | 317.8 > 206.7             | 200                   | -20       | -100   | -10    | -10        | -15        |
| Sulphamethoxazole    | 23.34                       | Negative              | 252              | 156 > 92                  | 200                   | -30       | -110   | -5     | -20/-36    | -7         |
| d4-Sulphamethoxazole | -                           | Negative              | 256              | 159.7 > 96                | 200                   | -30       | -110   | -5     | -20/-36    | -7         |
| Erythromycin         | 24.89                       | Positive              | 734.2            | 158.3 > 576.3             | 200                   | 20        | 100    | 10     | 35         | 30         |

**KEY:** DP – Declustering Potential; FP – Focussing Potential; EP – Entrance Potential; CE – Collision Energy; CXP – Collision Cell Exit Potential.
